# Supplementary material for: A Diagnostic Intercomparison of Modeled Ozone Dry Deposition Over North America and Europe Using AQMEII4 Regional-Scale Simulations
Source: Copernicus journal article supplement (doi:10.5194/egusphere-2025-225), 2025-02-06
Supplement: Supplementary file 1 [file egusphere-2025-225-supplement.pdf]

Supplement to:

## **A Diagnostic Intercomparison of Modeled Ozone Dry Deposition Over North America and Europe Using AQMEII4 Regional-Scale Simulations**

5 Christian Hogrefe<sup>1</sup>, Stefano Galmarini<sup>2</sup>, Paul A. Makar<sup>3</sup>, Ioannis Kioutsioukis<sup>4</sup>, Olivia E. Clifton<sup>5,6</sup>, Ummugulsum Alyuz<sup>7</sup>, Jesse O. Bash<sup>1</sup>, Roberto Bellasio<sup>8</sup>, Roberto Bianconi<sup>8</sup>, Tim Butler<sup>9</sup>, Philip Cheung<sup>3</sup>, Alma Hodzic<sup>10</sup>, Richard Kranenburg<sup>11</sup>, Aurelia Lupascu<sup>12</sup>, Kester Momoh<sup>7</sup>, Juan Luis Perez-Camanyo<sup>13</sup>, Jonathan E. Pleim<sup>1</sup>, Young-Hee Ryu<sup>14</sup>, Roberto San Jose<sup>13</sup>, Martijn Schaap<sup>11</sup>, Donna B. Schwede<sup>1,\*</sup>, and Ranjeet Sokhi<sup>7</sup>

10 <sup>1</sup>Center for Environmental Measurement and Modeling, US Environmental Protection Agency, 109 T.W. Alexander Dr., P.O. Box 12055, RTP, NC 27711, USA

<sup>2</sup>JRC, European Commission, Ispra, Italy

<sup>3</sup>Environment and Climate Change Canada, Toronto, Canada

<sup>4</sup>Department of Physics, University of Patras, Patras, Greece

15 <sup>5</sup>Center for Climate Systems Research, Columbia University, New York, NY, USA

<sup>6</sup>NASA Goddard Institute for Space Studies, New York, NY, USA

<sup>7</sup>Centre for Climate Change Research (C3R), U. Hertfordshire, UK

<sup>8</sup>Enviroware srl, Concorezzo, MB, Italy

<sup>9</sup>Research Institute for Sustainability – Helmholtz Centre Potsdam, Germany

20 <sup>10</sup>NCAR, Boulder, CO, USA

<sup>11</sup>TNO, Utrecht, the Netherlands

<sup>12</sup>ECMWF, Bonn, Germany

<sup>13</sup>Technical University of Madrid (UPM), Madrid, Spain

<sup>14</sup>Yonsei University, Seoul, South Korea

25 \*retired

*Correspondence to:* Christian Hogrefe (hogrefe.christian@epa.gov)

# Table of Contents

30

|    |                                                                                                                                                                                                                                                                                                                                                                                                                                                          |    |
|----|----------------------------------------------------------------------------------------------------------------------------------------------------------------------------------------------------------------------------------------------------------------------------------------------------------------------------------------------------------------------------------------------------------------------------------------------------------|----|
|    | Table S1: WRF/CMAQ STAGE mapping of the dry deposition module LU categories (AQMEII4) from the LSM LU categories (MODIS) .....                                                                                                                                                                                                                                                                                                                           | 5  |
|    | Table S2: GEM-MACH (Base) and GEM-MACH (Ops) mapping of the dry deposition module LU categories (Robichaud/Wesely 1989) from the LSM LU categories (Zhang 2003) .....                                                                                                                                                                                                                                                                                    | 6  |
| 35 | Table S3: WRF/Chem (RIFS) mapping of the dry deposition module LU categories (USGS24) from the LSM LU categories (CORINE) .....                                                                                                                                                                                                                                                                                                                          | 7  |
|    | Table S4: WRF/Chem (NCAR) mapping of the dry deposition module LU categories (USGS24) from the LSM LU categories (MODIS) .....                                                                                                                                                                                                                                                                                                                           | 8  |
| 40 | Table S5: WRF/CMAQ (STAGE) (EU4) mapping of the dry deposition module LU categories (AQMEII4) from the LSM LU categories (MODIS + U.K. Urban) .....                                                                                                                                                                                                                                                                                                      | 9  |
|    | Figure S1: Seasonal and diurnal variations in 2016 NA domain total O <sub>3</sub> grid-scale dry deposition fluxes (in Tg). Totals are calculated over all non-water grid cells in the analysis domain common to all models. Daytime values are calculated from 10:00 LST to 14:00 LST while nighttime values are calculated from 22:00 LST to 02:00 LST. a) winter daytime, b) summer daytime, c) winter nighttime, d) summer nighttime.....            | 10 |
| 45 | Figure S2: Seasonal and diurnal variations in 2016 NA domain average O <sub>3</sub> grid-scale dry deposition velocities (in cm/s). Averages are calculated over all non-water grid cells in the analysis domain common to all models. Daytime values are calculated from 10:00 LST to 14:00 LST while nighttime values are calculated from 22:00 LST to 02:00 LST. a) winter daytime, b) summer daytime, c) winter nighttime, d) summer nighttime ..... | 11 |
| 50 | Figure S3: Percentage contributions of grid-scale ozone effective conductances to the sum of all pathways, averaged over the entire year. Results are for the NA domain during 2016. Note that these maps are not clipped to the domain common to all simulations and show the maximum spatial extent of non-water cells submitted for each model.....                                                                                                   | 12 |
|    | Figure S4: Percentage contributions of grid-scale ozone effective conductances to the sum of all pathways, averaged over the entire year. Results are for the EU domain during 2010. Note that these maps are not clipped to the domain common to all simulations and show the maximum spatial extent of non-water cells submitted for each model.....                                                                                                   | 13 |
| 55 | Figure S5: Percentage contributions of grid-scale ozone effective conductances to the sum of all pathways, averaged over all hours during summer. Results are for the NA domain during 2016. Note that these maps are not clipped to the domain common to all simulations and show the maximum spatial extent of non-water cells submitted for each model. ....                                                                                          | 14 |
|    | Figure S6: As in Figure S5 but for winter. ....                                                                                                                                                                                                                                                                                                                                                                                                          | 15 |
| 60 | Figure S7: Summer and winter effective conductances and ozone deposition velocities calculated by the grid models for evergreen needleleaf forest grid cells and calculated by the corresponding subset of single point (SP) models                                                                                                                                                                                                                      |    |

|    |                                                                                                                                                                                                                                                                                                                                                                                                                                                                                                                                                                                         |    |
|----|-----------------------------------------------------------------------------------------------------------------------------------------------------------------------------------------------------------------------------------------------------------------------------------------------------------------------------------------------------------------------------------------------------------------------------------------------------------------------------------------------------------------------------------------------------------------------------------------|----|
|    | analyzed in Clifton et al. (2023) at the Hyytiälä (HY) site. In the x-axis labels, results for the SP GEM-MACH Wesely simulations are shown as “SP GM Wesely” while results for the SP WRF-Chem Wesely simulations are shown as “SP WC Wesely”. The evergreen needleleaf forest grid cells selected for this analysis are those in which a given model                                                                                                                                                                                                                                  |    |
| 65 | had at least 85% coverage for this LU category. The number of these grid cells differs across models due to underlying differences in LU (see Section 3.3). .....                                                                                                                                                                                                                                                                                                                                                                                                                       | 16 |
|    | Figure S8: Summer and winter effective conductances and ozone deposition velocities calculated by the grid models for deciduous broadleaf forest grid cells and calculated by the corresponding subset of single point (SP) models analyzed in Clifton et al. (2023) at the Ispra (IS) site. In the x-axis labels, results for the SP GEM-MACH Wesely                                                                                                                                                                                                                                   |    |
| 70 | simulations are shown as “SP GM Wesely” while results for the SP WRF-Chem Wesely simulations are shown as “SP WC Wesely”. The deciduous broadleaf forest grid cells selected for this analysis are those in which a given model had at least 85% coverage for this LU category. The number of these grid cells differs across models due to underlying differences in LU (see Section 3.3). .....                                                                                                                                                                                       | 17 |
|    | Figure S9: Summer and winter effective conductances and ozone deposition velocities calculated by the grid models for grassland grid cells and calculated by the corresponding subset of single point (SP) models analyzed in Clifton et al. (2023) at the Easter Bush (EB) and Bugacpuszta (BP) sites. In the x-axis labels, results for the SP GEM-MACH                                                                                                                                                                                                                               |    |
| 75 | Wesely simulations are shown as “SP GM Wesely” while results for the SP WRF-Chem Wesely simulations are shown as “SP WC Wesely”. The grassland grid cells selected for this analysis are those in which a given model had at least 85% coverage for this LU category. The number of these grid cells differs across models due to underlying                                                                                                                                                                                                                                            |    |
| 80 | differences in LU (see Section 3.3). .....                                                                                                                                                                                                                                                                                                                                                                                                                                                                                                                                              | 18 |
|    | Figure S10: Fractional coverage of the evergreen needleleaf forest LU category for each of the participating models over the NA domain. ....                                                                                                                                                                                                                                                                                                                                                                                                                                            | 19 |
|    | Figure S11: Fractional coverage of the evergreen needleleaf forest LU category for each of the participating models over the EU domain. ....                                                                                                                                                                                                                                                                                                                                                                                                                                            | 20 |
| 85 | Figure S12: For each LU category, maps depicting the location of grid cells that i) do not share a common dominant LU category across models (white cells), ii) share a common dominant LU category across models but not all models have a fractional coverage > 85% for that LU category (blue cells), or iii) share a common dominant LU category across models and all models have a fractional coverage > 85% for that LU category (red). Results show are for the NA domain. The number of blue and red cells is shown as insert in each map. No maps are shown for the deciduous |    |
| 90 | needleleaf forest, herbaceous, and savanna LU categories because there is not a single common dominant LU grid cell across models for these categories (see Table 5). ....                                                                                                                                                                                                                                                                                                                                                                                                              | 21 |
|    | Figure S13. For each LU category, maps depicting the location of grid cells that i) do not share a common dominant LU category across models (white cells), ii) share a common dominant LU category across models but not all models have a fractional coverage > 85% for that LU category (blue cells), or iii) share a common dominant LU category                                                                                                                                                                                                                                    |    |
| 95 | across models and all models have a fractional coverage > 85% for that LU category (red). Results show are for the EU domain. The number of blue and red cells is shown as insert in each map. No maps are shown for the deciduous                                                                                                                                                                                                                                                                                                                                                      |    |

needleleaf forest, evergreen broadleaf forest, mixed forest, shrubland, herbaceous, savanna, wetlands, tundra, and snow and ice LU categories because there is not a single common dominant LU grid cell across models for these categories (see Table 5). .....22

100 Figure S14. LU-specific annual domain-total dry deposition fluxes (Tg), LU-specific annual mean dry deposition velocity (cm/s), and percentage LU category domain coverage (excluding water grid cells) for seven selected LU categories over the EU domain. For each LU category and model, the analysis considered grid cells in the analysis domain common to all models in which a given model had at least 85% coverage for this LU category. The number of these grid cells differs across models due to underlying differences in LU (see Section 3.3).....23

105 References .....24



**Table S1: WRF/CMAQ STAGE mapping of the dry deposition module LU categories (AQMEII4) from the LSM LU categories (MODIS for the U.S. EPA simulations over North America, MODIS + extended urban categories over the greater London area for the University of Hertfordshire simulations over Europe)**

| Dry Deposition LU              | LSM LU                                                                                                                                            |
|--------------------------------|---------------------------------------------------------------------------------------------------------------------------------------------------|
| 1: Water                       | 17: water                                                                                                                                         |
| 2: Developed / Urban           | 13: Urban and Built-up<br>Additional urban categories over the greater London area for the University of Hertfordshire WRF/CMAQ STAGE simulations |
| 3: Barren                      | 16: Barren or Sparsely Vegetated                                                                                                                  |
| 4: Evergreen needleleaf forest | 1: Evergreen Needleleaf Forest                                                                                                                    |
| 5: Deciduous needleleaf forest | 3: Deciduous Needleleaf Forest                                                                                                                    |
| 6: Evergreen broadleaf forest  | 2: Evergreen Broadleaf Forest                                                                                                                     |
| 7: Deciduous broadleaf forest  | 4: Deciduous Broadleaf Forest                                                                                                                     |
| 8: Mixed forest                | 5: Mixed Forest                                                                                                                                   |
| 9: Shrubland                   | 6: Closed Shrublands; 7: Open Shrublands                                                                                                          |
| 10: Herbaceous                 | N/A                                                                                                                                               |
| 11: Planted / Cultivated       | 12: Croplands<br>14: Cropland-Natural Vegetation Mosaic                                                                                           |
| 12: Grassland                  | 10: Grasslands                                                                                                                                    |
| 13: Savanna                    | 8: Woody Savanna<br>9: Savanna                                                                                                                    |
| 14: Wetlands                   | 11: Permanent Wetlands                                                                                                                            |
| 15: Tundra                     | 18: Wooded Tundra<br>19: Mixed Tundra<br>20: Barren Tundra                                                                                        |
| 16: Snow and Ice               | 15: Snow and Ice                                                                                                                                  |

**Table S2. GEM-MACH (Base) and GEM-MACH (Ops) mapping of the dry deposition module LU categories (Robichaud/Wesely 1989) from the LSM LU categories (Zhang 2003)**

| Dry Deposition LU              | LSM LU                                                                                                                      |
|--------------------------------|-----------------------------------------------------------------------------------------------------------------------------|
| 1: Evergreen needleleaf forest | 4: Evergreen needleleaf trees                                                                                               |
| 2: Evergreen broadleaf forest  | 5: Evergreen broadleaf trees<br>8: Tropical broadleaf trees                                                                 |
| 3: Deciduous needleleaf forest | 6: Deciduous needleleaf trees                                                                                               |
| 4: Deciduous broadleaf forest  | 7: Deciduous broadleaf trees<br>9: Drought deciduous trees                                                                  |
| 5: Mixed Forest                | 25: Mixed Wood Forest                                                                                                       |
| 6: Grassland                   | 14: Long grass                                                                                                              |
| 7: Crops, mixed farming        | 15: Crops<br>17: Sugar<br>18: Maize<br>19: Cotton<br>20: Irrigated Crops                                                    |
| 8: Desert                      | 24: Desert                                                                                                                  |
| 9: Tundra                      | 22: Tundra                                                                                                                  |
| 10: Dwarf trees, shrubs        | 10: Evergreen broadleaf shrubs<br>11: Deciduous shrubs<br>12: Thorn shrubs<br>13: Short grass and forbs<br>26: Mixed Shrubs |
| 11: Wetland with plants        | 22: Swamp                                                                                                                   |
| 12: Ice caps and glaciers      | 2: Ice                                                                                                                      |
| 13: Inland water               | 3: Inland Lake (Fresh)                                                                                                      |
| 14: Ocean                      | 1: Water (Ocean)                                                                                                            |
| 15: Urban                      | 21: Urban                                                                                                                   |

120 **Table S3. WRF/Chem (RIFS) mapping of the dry deposition module LU categories (USGS24) from the LSM LU categories (CORINE)**

| Dry Deposition LU                               | LSM LU                                                                                          |
|-------------------------------------------------|-------------------------------------------------------------------------------------------------|
| 1: Urban and Built-Up Land                      | 31: Low Intensity Residential<br>32: High Intensity Residential<br>33: Industrial or Commercial |
| 2: Dryland Cropland and Pasture                 | 2: Dryland Cropland and Pasture                                                                 |
| 3: Irrigated Cropland and Pasture               | 3: Irrigated Cropland and Pasture;                                                              |
| 4: Mixed Dryland/Irrigated Cropland and Pasture | 4: Mixed Dryland/Irrigated Cropland and Pasture                                                 |
| 5: Cropland / Grassland Mosaic                  | 5: Cropland/Grassland Mosaic;                                                                   |
| 6: Cropland / Woodland Mosaic                   | 6: Cropland/Woodland Mosaic                                                                     |
| 7: Grassland                                    | 7: Grassland                                                                                    |
| 8: Shrubland                                    | 8: Shrubland                                                                                    |
| 9: Mixed Shrubland / Grassland                  | 9: Mixed Shrubland / Grassland                                                                  |
| 10: Savanna                                     | 10: Savanna                                                                                     |
| 11: Deciduous Broadleaf Forest                  | 11: Deciduous Broadleaf Forest                                                                  |
| 12: Deciduous Needleleaf Forest                 | 12: Deciduous Needleleaf Forest                                                                 |
| 13: Evergreen Broadleaf Forest                  | 13: Evergreen Broadleaf Forest                                                                  |
| 14: Evergreen Needleleaf Forest                 | 14: Evergreen Needleleaf Forest                                                                 |
| 15: Mixed Forest                                | 15: Mixed Forest                                                                                |
| 16: Water Bodies                                | 16: Water Bodies                                                                                |
| 17: Herbaceous Wetland                          | 17: Herbaceous Wetland                                                                          |
| 18: Wooded Wetland                              | 18: Wooded Wetland                                                                              |
| 19: Barren or Sparsely Vegetated                | 19: Barren or Sparsely Vegetated                                                                |
| 20: Herbaceous Tundra                           | 20: Herbaceous Tundra                                                                           |
| 21: Wooded Tundra                               | 21: Wooded Tundra                                                                               |
| 22: Mixed Tundra                                | 22: Mixed Tundra                                                                                |
| 23: Bare Ground Tundra                          | 23: Bare Ground Tundra                                                                          |
| 24 Snow or Ice                                  | 24: Snow or Ice                                                                                 |

125 **Table S4: WRF/Chem (NCAR) mapping of the dry deposition module LU categories (USGS24) from the LSM LU categories (MODIS)**

| Dry Deposition LU                               | LSM LU                                                |
|-------------------------------------------------|-------------------------------------------------------|
| 1: Urban and Built-Up Land                      | 13 Urban and Built-Up                                 |
| 2: Dryland Cropland and Pasture                 | N/A                                                   |
| 3: Irrigated Cropland and Pasture               | N/A                                                   |
| 4: Mixed Dryland/Irrigated Cropland and Pasture | 12 Croplands                                          |
| 5: Cropland / Grassland Mosaic                  | 14 cropland/natural vegetation mosaic                 |
| 6: Cropland / Woodland Mosaic                   | N/A                                                   |
| 7: Grassland                                    | 10: Grasslands                                        |
| 8: Shrubland                                    | 6: Closed Shrublands                                  |
| 9: Mixed Shrubland / Grassland                  | 7: Open Shrublands                                    |
| 10: Savanna                                     | 8: Woody Savannas<br>9: Savannas                      |
| 11: Deciduous Broadleaf Forest                  | 4: Deciduous Broadleaf Forest                         |
| 12: Deciduous Needleleaf Forest                 | 3: Deciduous Needleleaf Forest                        |
| 13: Evergreen Broadleaf Forest                  | 2: Evergreen Broadleaf Forest                         |
| 14: Evergreen Needleleaf Forest                 | 1: Evergreen Needleleaf Forest                        |
| 15: Mixed Forest                                | 5: Mixed Forests                                      |
| 16: Water Bodies                                | 17: Water                                             |
| 17: Herbaceous Wetland                          | 11: Permanent wetlands                                |
| 18: Wooded Wetland                              | N/A                                                   |
| 19: Barren or Sparsely Vegetated                | 16: Barren or Sparsely Vegetated<br>20: Barren Tundra |
| 20: Herbaceous Tundra                           | N/A                                                   |
| 21: Wooded Tundra                               | 18: Wooded Tundra                                     |
| 22: Mixed Tundra                                | 19: Mixed Tundra                                      |
| 23: Bare Ground Tundra                          | N/A                                                   |
| 24: Snow or Ice                                 | 15: Snow and Ice                                      |

130 **Table S5: WRF/CMAQ (STAGE) (EU4) mapping of the dry deposition module LU categories (AQMEII4) from the LSM LU categories (MODIS + U.K. Urban)**

| Dry Deposition LU              | LSM LU                                                                                                                                                                                                |
|--------------------------------|-------------------------------------------------------------------------------------------------------------------------------------------------------------------------------------------------------|
| 1: Water                       | 17: water                                                                                                                                                                                             |
| 2: Developed / Urban           | 13: Urban and Built-up<br>31: Low Intensity Residential (present only for London)<br>32: High Intensity Residential (present only for London)<br>33: Industrial or Commercial (not present in domain) |
| 3: Barren                      | 16: Barren or Sparsely Vegetated                                                                                                                                                                      |
| 4: Evergreen needleleaf forest | 1: Evergreen Needleleaf Forest                                                                                                                                                                        |
| 5: Deciduous needleleaf forest | 3: Deciduous Needleleaf Forest                                                                                                                                                                        |
| 6: Evergreen broadleaf forest  | 2: Evergreen Broadleaf Forest                                                                                                                                                                         |
| 7: Deciduous broadleaf forest  | 4: Deciduous Broadleaf Forest                                                                                                                                                                         |
| 8: Mixed forest                | 5: Mixed Forest                                                                                                                                                                                       |
| 9: Shrubland                   | 6: Closed Shrublands<br>7: Open Shrublands                                                                                                                                                            |
| 10: Herbaceous                 | N/A                                                                                                                                                                                                   |
| 11: Planted / Cultivated       | 12: Croplands<br>14: Cropland-Natural Vegetation Mosaic                                                                                                                                               |
| 12: Grassland                  | 10: Grasslands                                                                                                                                                                                        |
| 13: Savanna                    | 8: Woody Savanna<br>9: Savanna                                                                                                                                                                        |
| 14: Wetlands                   | 11: Permanent Wetlands                                                                                                                                                                                |
| 15: Tundra                     | 18: Wooded Tundra<br>19: Mixed Tundra<br>20: Barren Tundra                                                                                                                                            |
| 16: Snow and Ice               | 15: Snow and Ice                                                                                                                                                                                      |

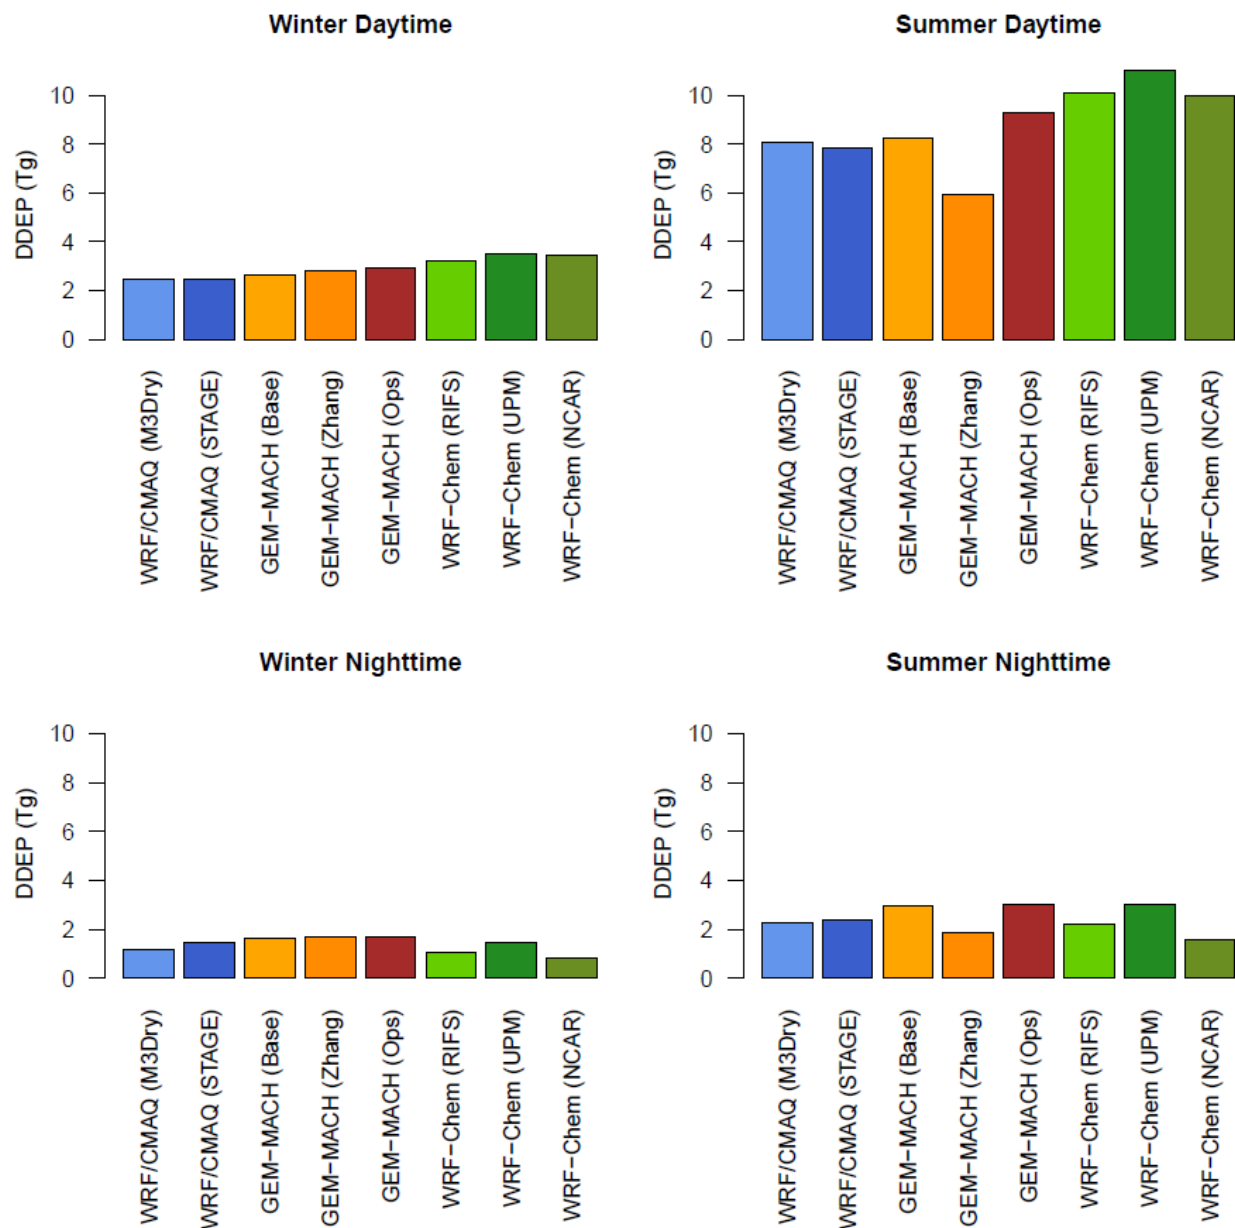

Figure S1: Seasonal and diurnal variations in 2016 NA domain total O<sub>3</sub> grid-scale dry deposition fluxes (in Tg). Totals are calculated over all non-water grid cells in the analysis domain common to all models. Daytime values are calculated from 10:00 LST to 14:00 LST while nighttime values are calculated from 22:00 LST to 02:00 LST. a) winter daytime, b) summer daytime, c) winter nighttime, d) summer nighttime

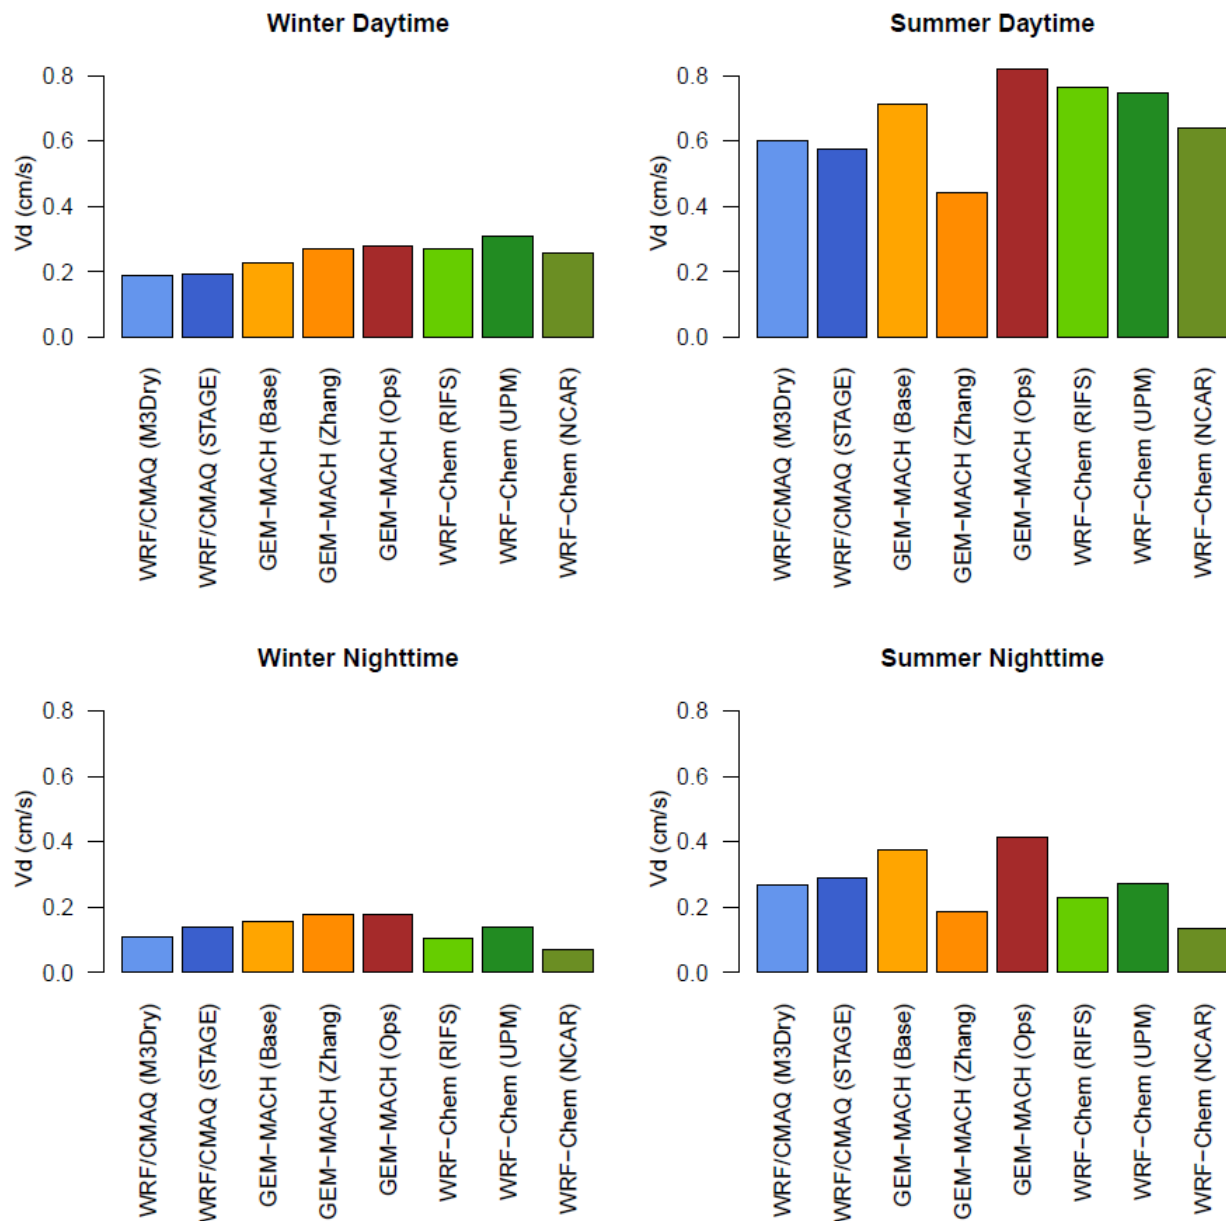

**Figure S2: Seasonal and diurnal variations in 2016 NA domain average O<sub>3</sub> grid-scale dry deposition velocities (in cm/s). Averages are calculated over all non-water grid cells in the analysis domain common to all models. Daytime values are calculated from 10:00 LST to 14:00 LST while nighttime values are calculated from 22:00 LST to 02:00 LST. a) winter daytime, b) summer daytime, c) winter nighttime, d) summer nighttime**

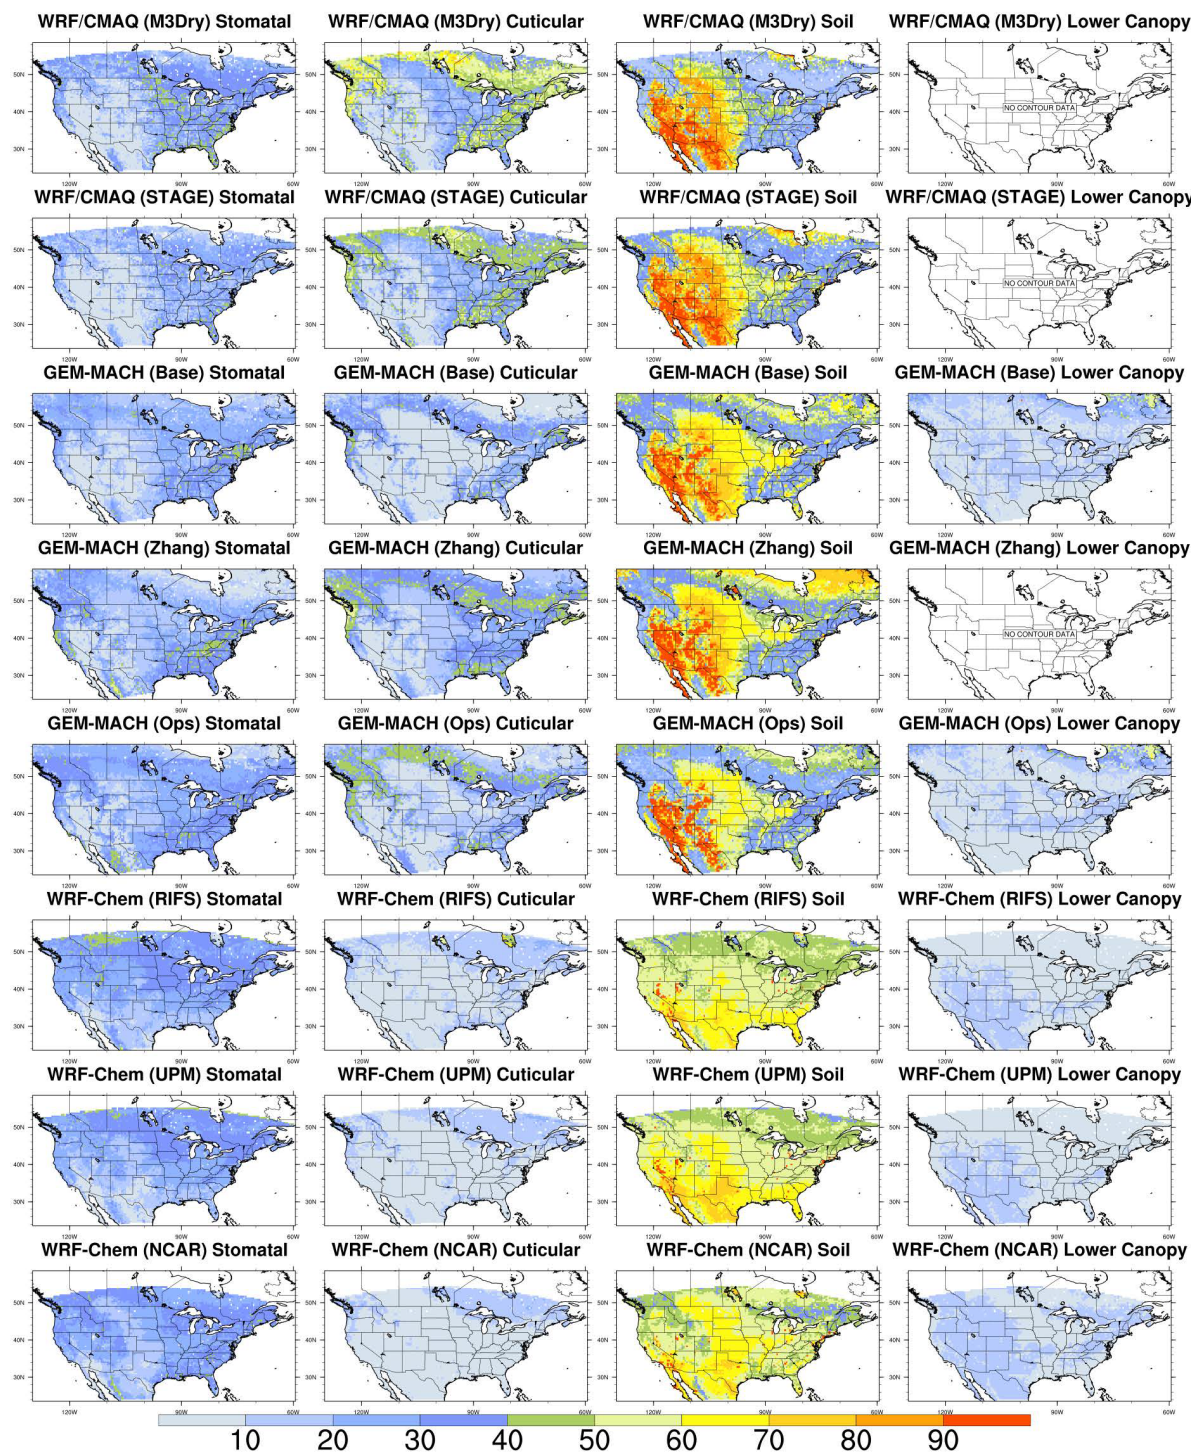

150 **Figure S3: Percentage contributions of grid-scale ozone effective conductances to the sum of all pathways, averaged over the entire year. Results are for the NA domain during 2016. Note that these maps are not clipped to the domain common to all simulations and show the maximum spatial extent of non-water cells submitted for each model.**



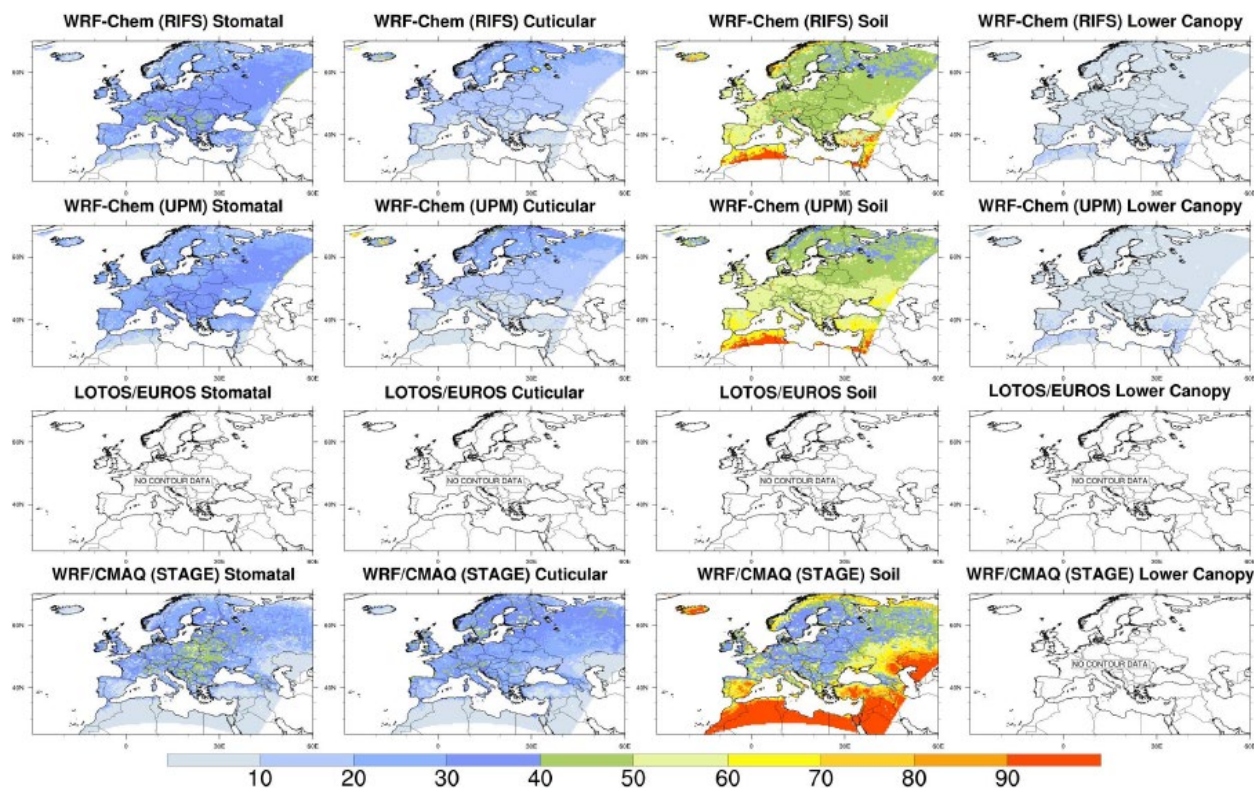

**Figure S4: Percentage contributions of grid-scale ozone effective conductances to the sum of all pathways, averaged over the entire year. Results are for the EU domain during 2010. Note that these maps are not clipped to the domain common to all simulations and show the maximum spatial extent of non-water cells submitted for each model.**

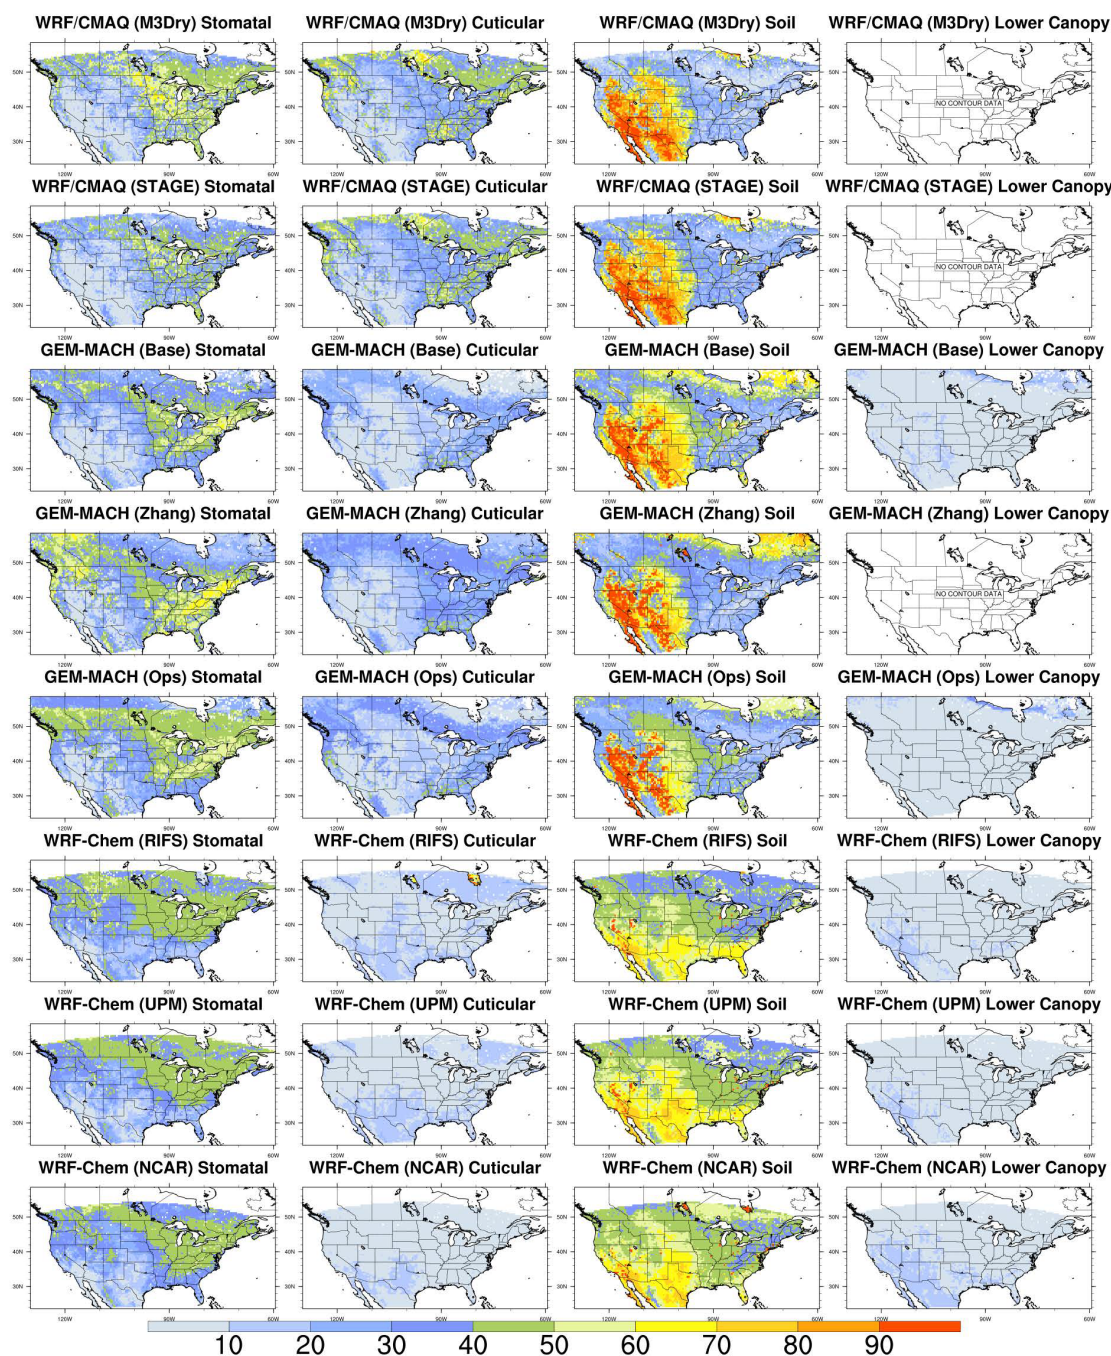

**Figure S5. Percentage contributions of grid-scale ozone effective conductances to the sum of all pathways, averaged over all hours during summer. Results are for the NA domain during 2016. Note that these maps are not clipped to the domain common to all simulations and show the maximum spatial extent of non-water cells submitted for each model.**



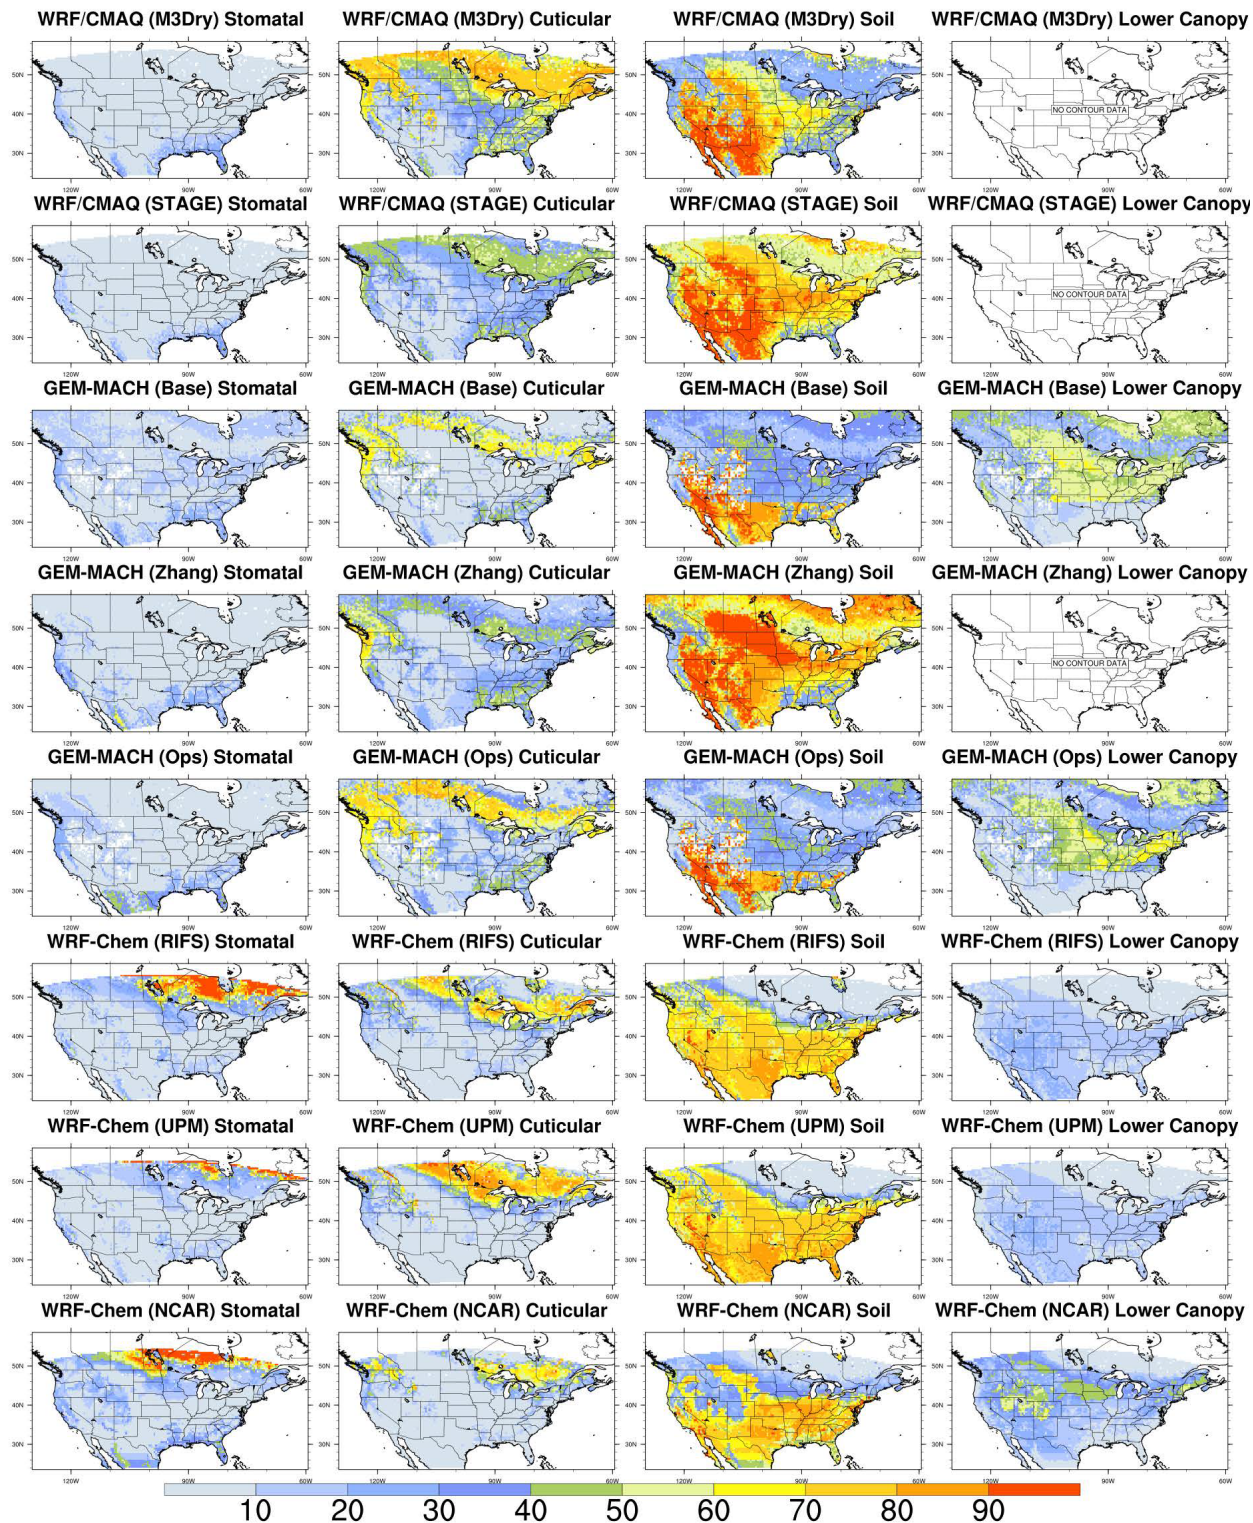

Figure S6: As in Figure S5 but for winter.

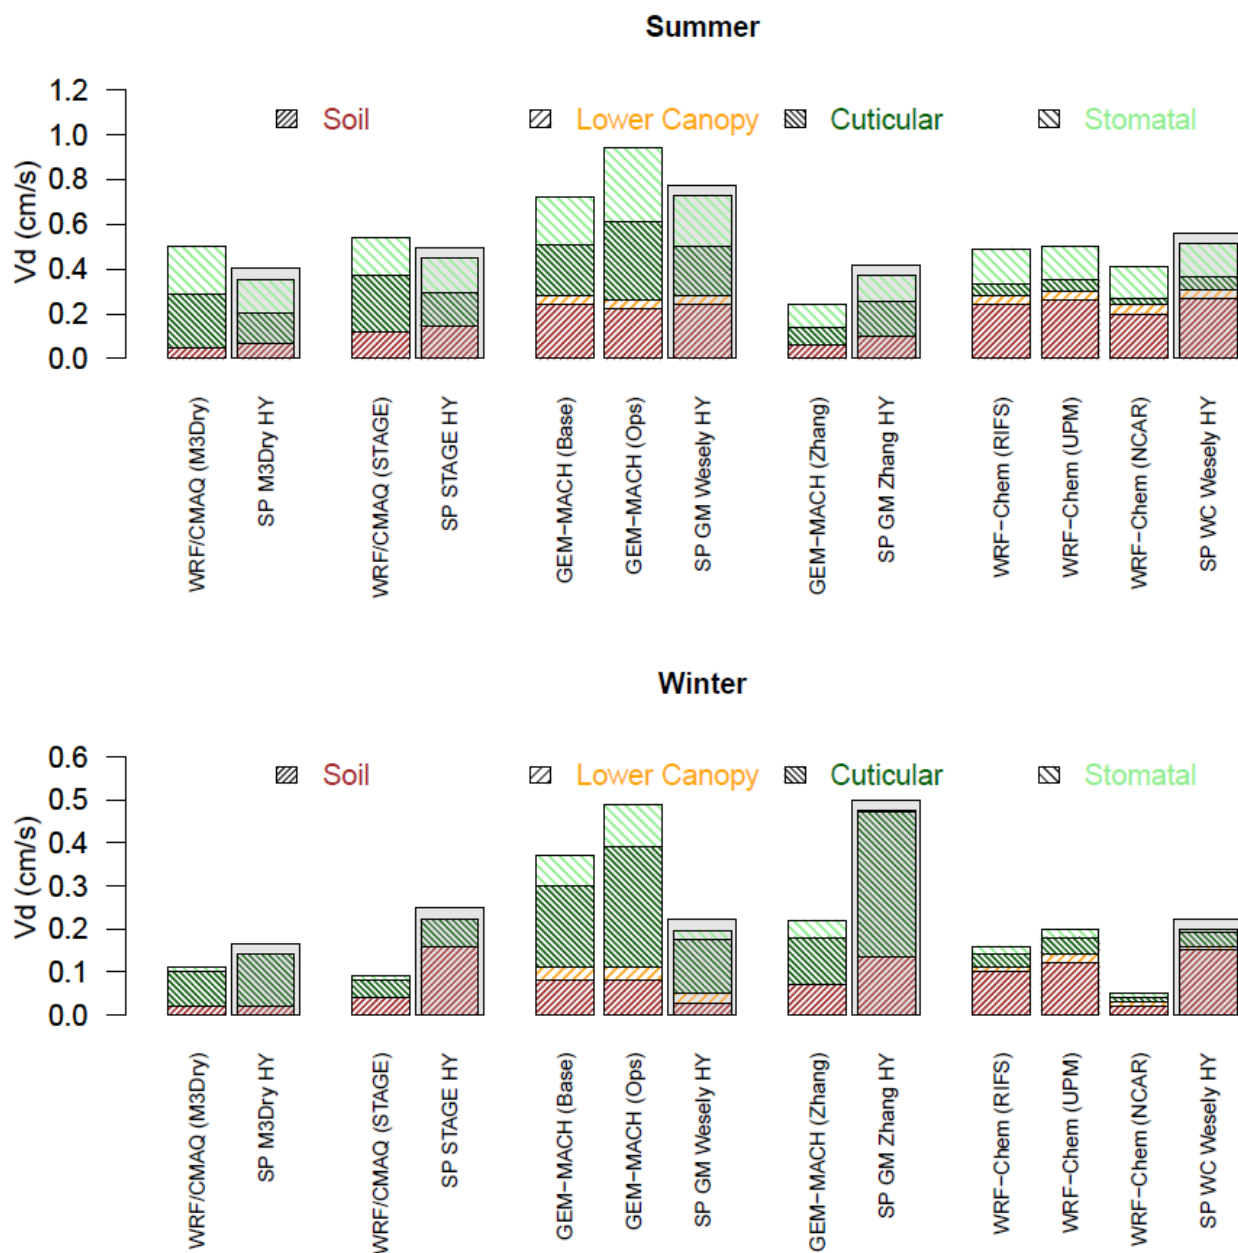

Figure S7: Summer and winter effective conductances and ozone deposition velocities calculated by the grid models for evergreen needleleaf forest grid cells and calculated by the corresponding subset of single point (SP) models analyzed in Clifton et al. (2023) at the Hyytiälä (HY) site. In the x-axis labels, results for the SP GEM-MACH Wesely simulations are shown as “SP GM Wesely” while results for the SP WRF-Chem Wesely simulations are shown as “SP WC Wesely”. The evergreen needleleaf forest grid cells selected for this analysis are those in which a given model had at least 85% coverage for this LU category. The number of these grid cells differs across models due to underlying differences in LU (see Section 3.3).



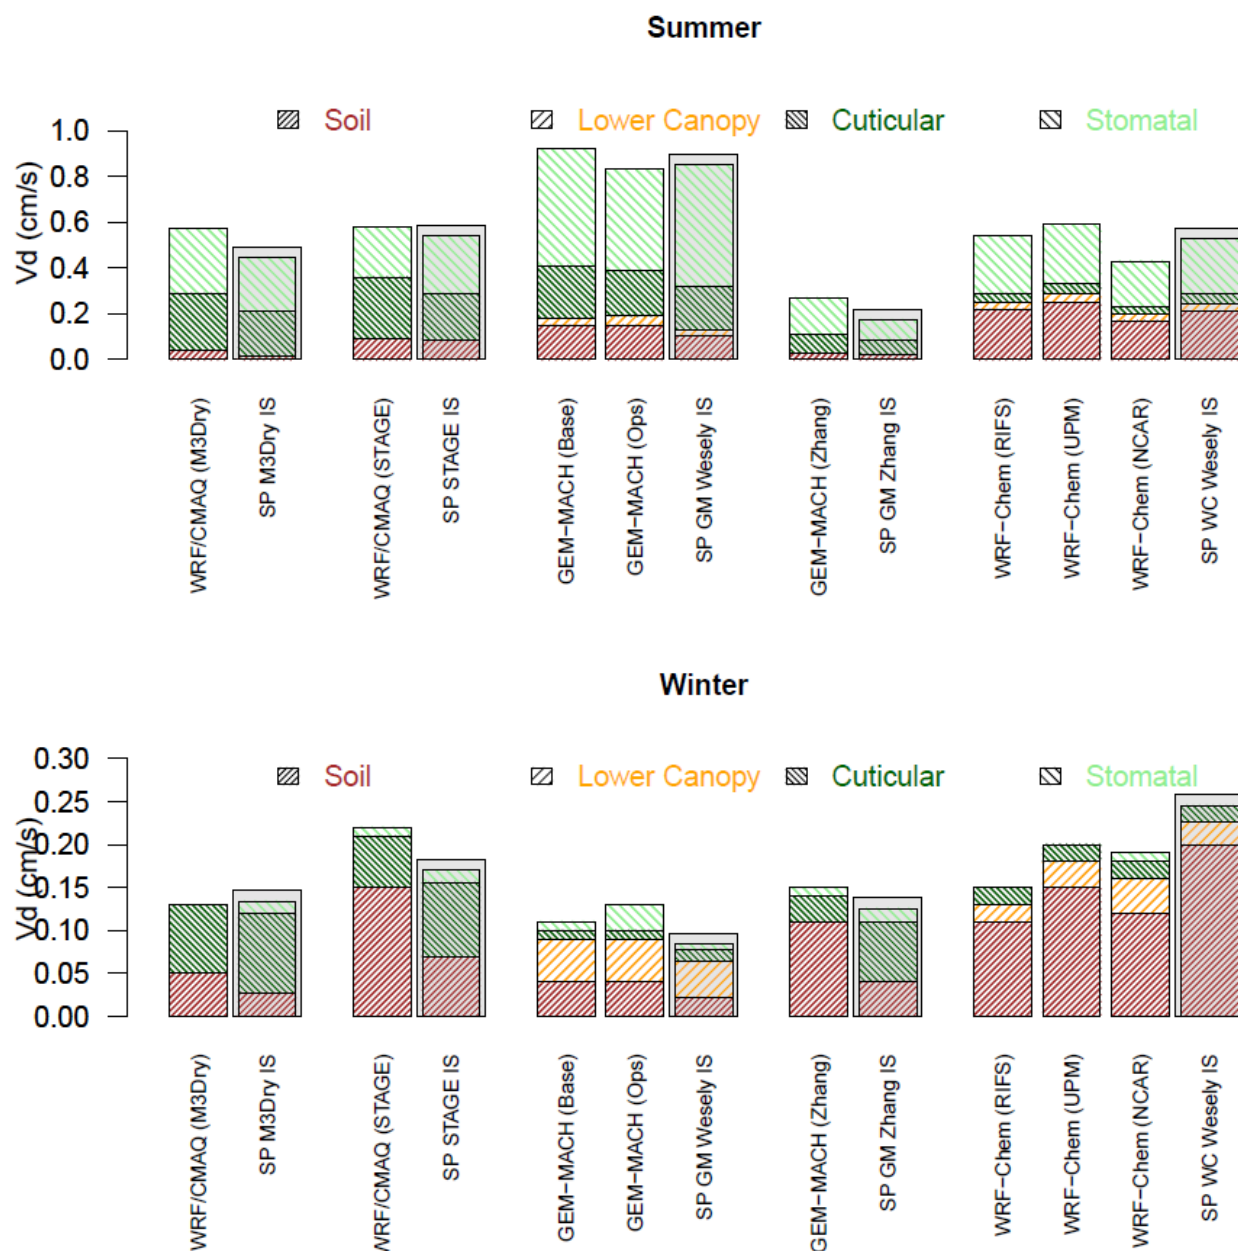

Figure S8: Summer and winter effective conductances and ozone deposition velocities calculated by the grid models for deciduous broadleaf forest grid cells and calculated by the corresponding subset of single point (SP) models analyzed in Clifton et al. (2023) at the Ispra (IS) site. In the x-axis labels, results for the SP GEM-MACH Wesely simulations are shown as “SP GM Wesely” while results for the SP WRF-Chem Wesely simulations are shown as “SP WC Wesely”. The deciduous broadleaf forest grid cells selected for this analysis are those in which a given model had at least 85% coverage for this LU category. The number of these grid cells differs across models due to underlying differences in LU (see Section 3.3).

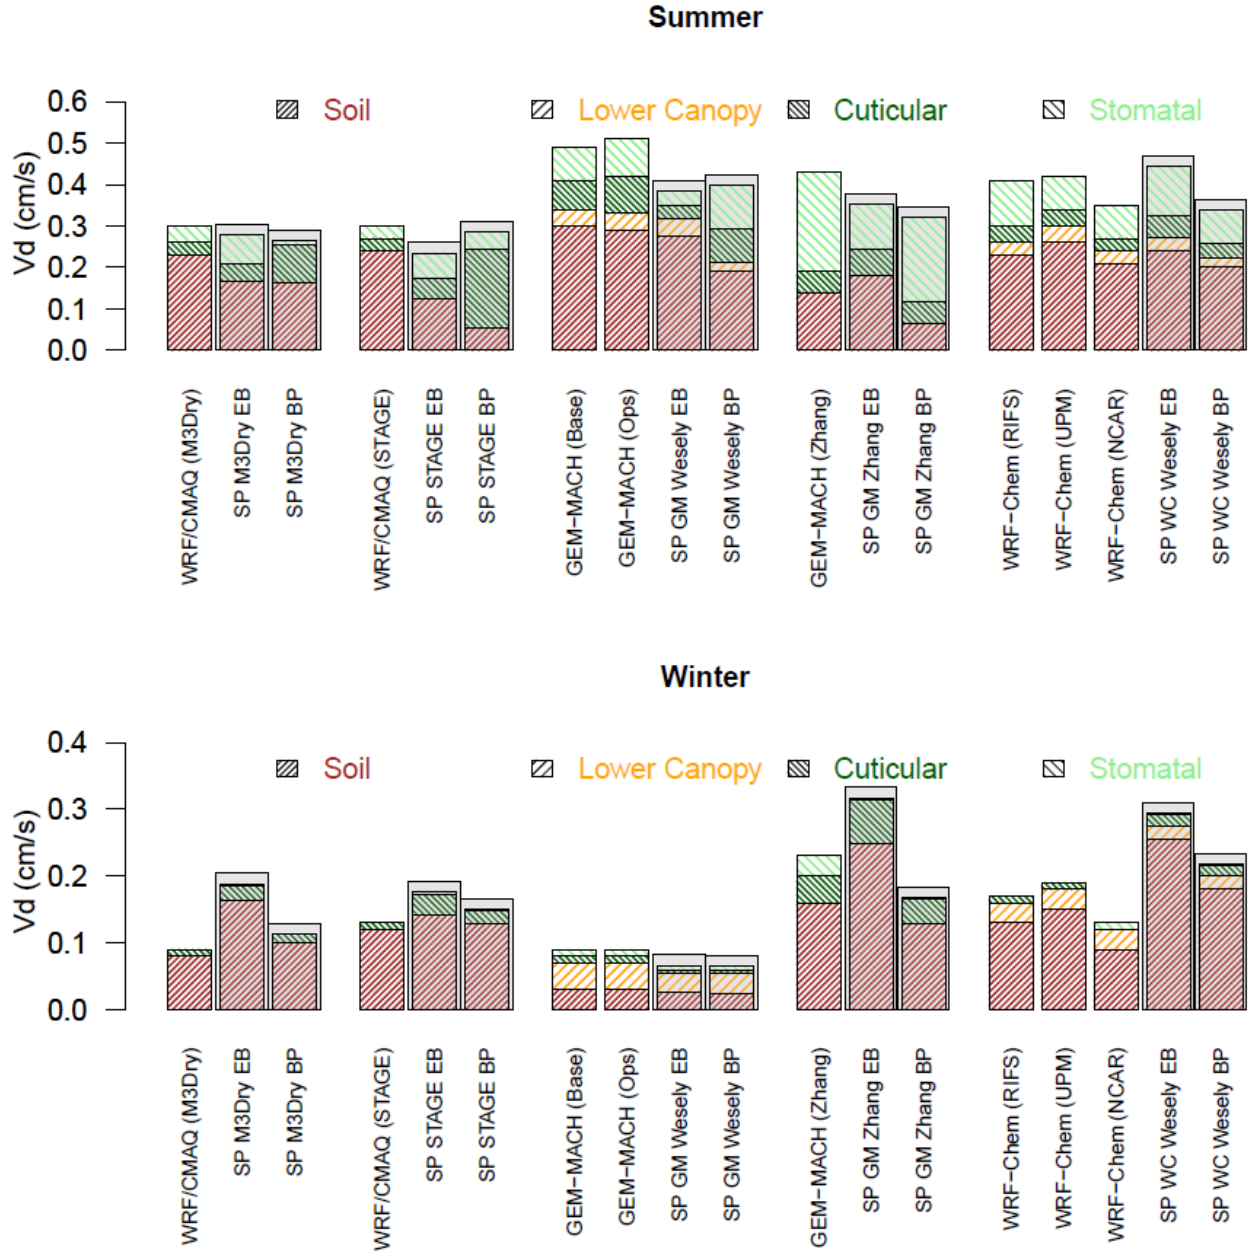

Figure S9: Summer and winter effective conductances and ozone deposition velocities calculated by the grid models for grassland grid cells and calculated by the corresponding subset of single point (SP) models analyzed in Clifton et al. (2023) at the Easter Bush (EB) and Bugacpuszta (BP) sites. In the x-axis labels, results for the SP GEM-MACH Wesely simulations are shown as “SP GM Wesely” while results for the SP WRF-Chem Wesely simulations are shown as “SP WC Wesely”. The grassland grid cells selected for this analysis are those in which a given model had at least 85% coverage for this LU category. The number of these grid cells differs across models due to underlying differences in LU (see Section 3.3).

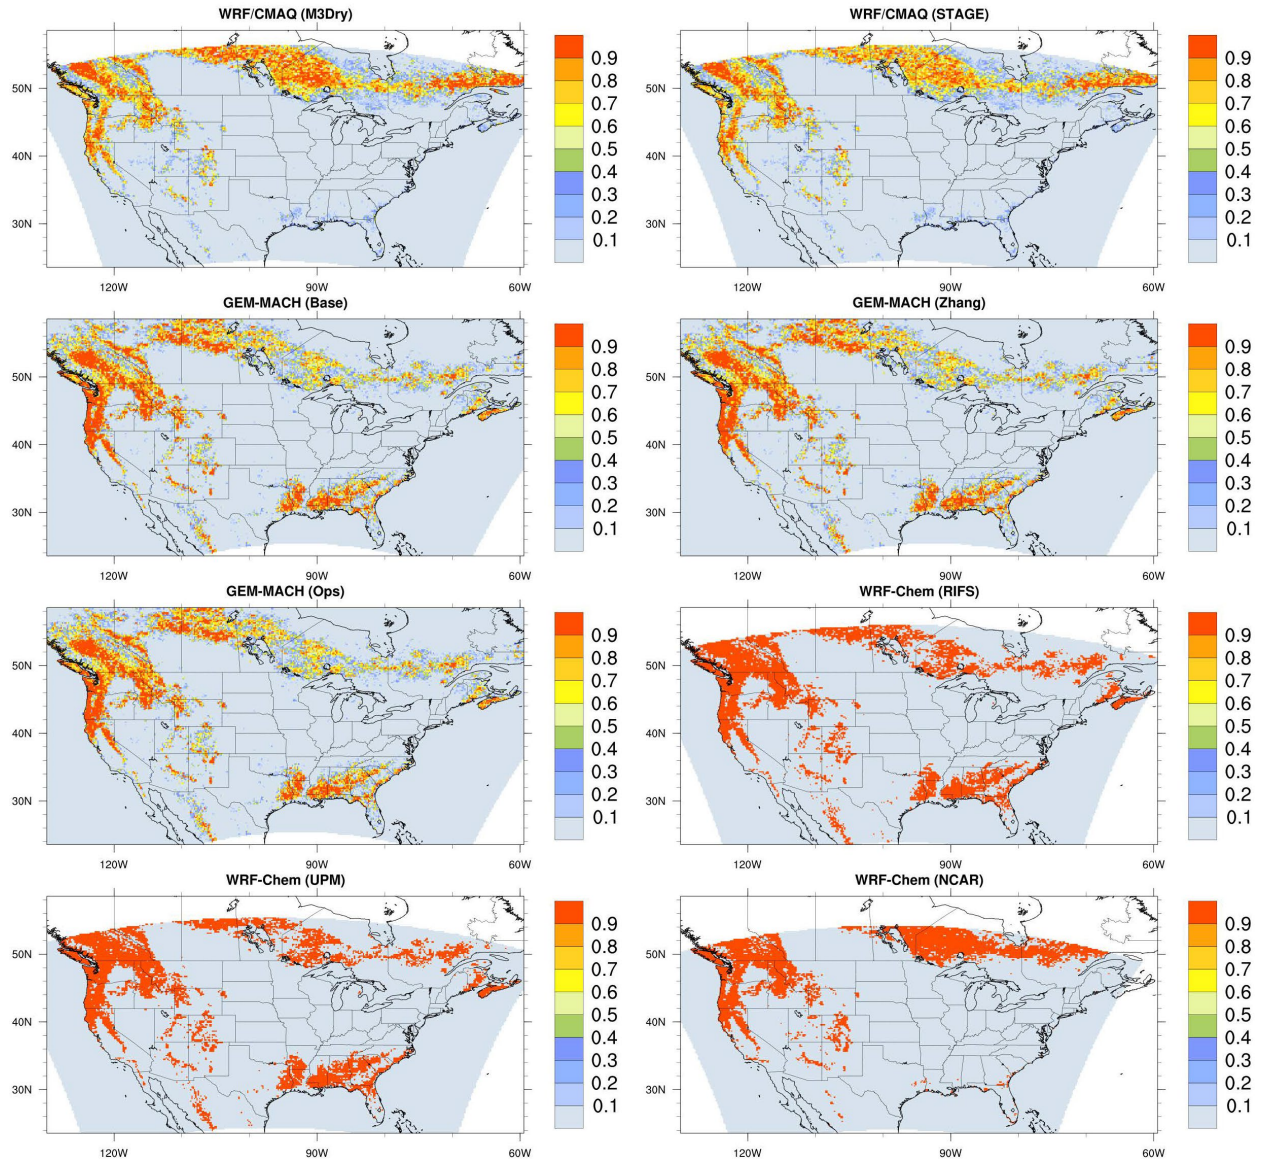

200 **Figure S10: Fractional coverage of the evergreen needleleaf forest LU category for each of the participating models over the NA domain.**



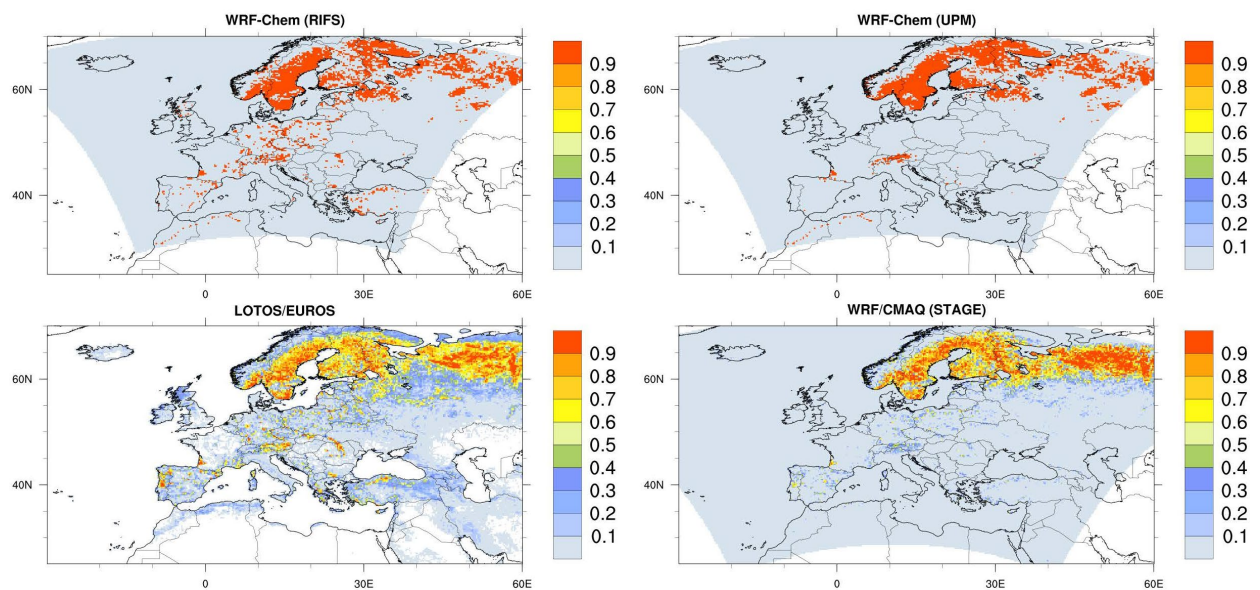

**Figure S11: Fractional coverage of the evergreen needleleaf forest LU category for each of the participating models over the EU domain.**

205



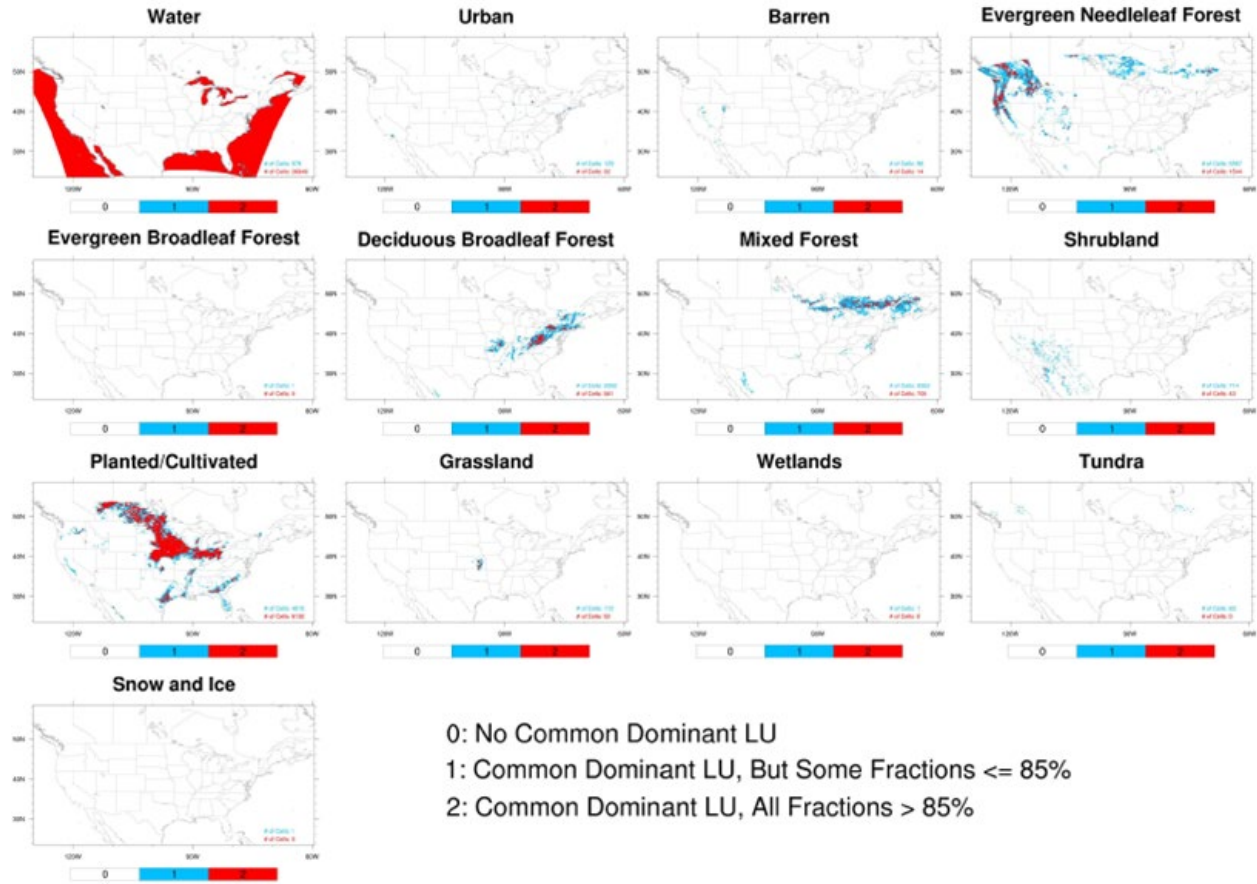

Figure S12: For each LU category, maps depicting the location of grid cells that i) do not share a common dominant LU category across models (white cells), ii) share a common dominant LU category across models but not all models have a fractional coverage  $> 85\%$  for that LU category (blue cells), or iii) share a common dominant LU category across models and all models have a fractional coverage  $> 85\%$  for that LU category (red). Results show are for the NA domain. The number of blue and red cells is shown as insert in each map. No maps are shown for the deciduous needleleaf forest, herbaceous, and savanna LU categories because there is not a single common dominant LU grid cell across models for these categories (see Table 5).

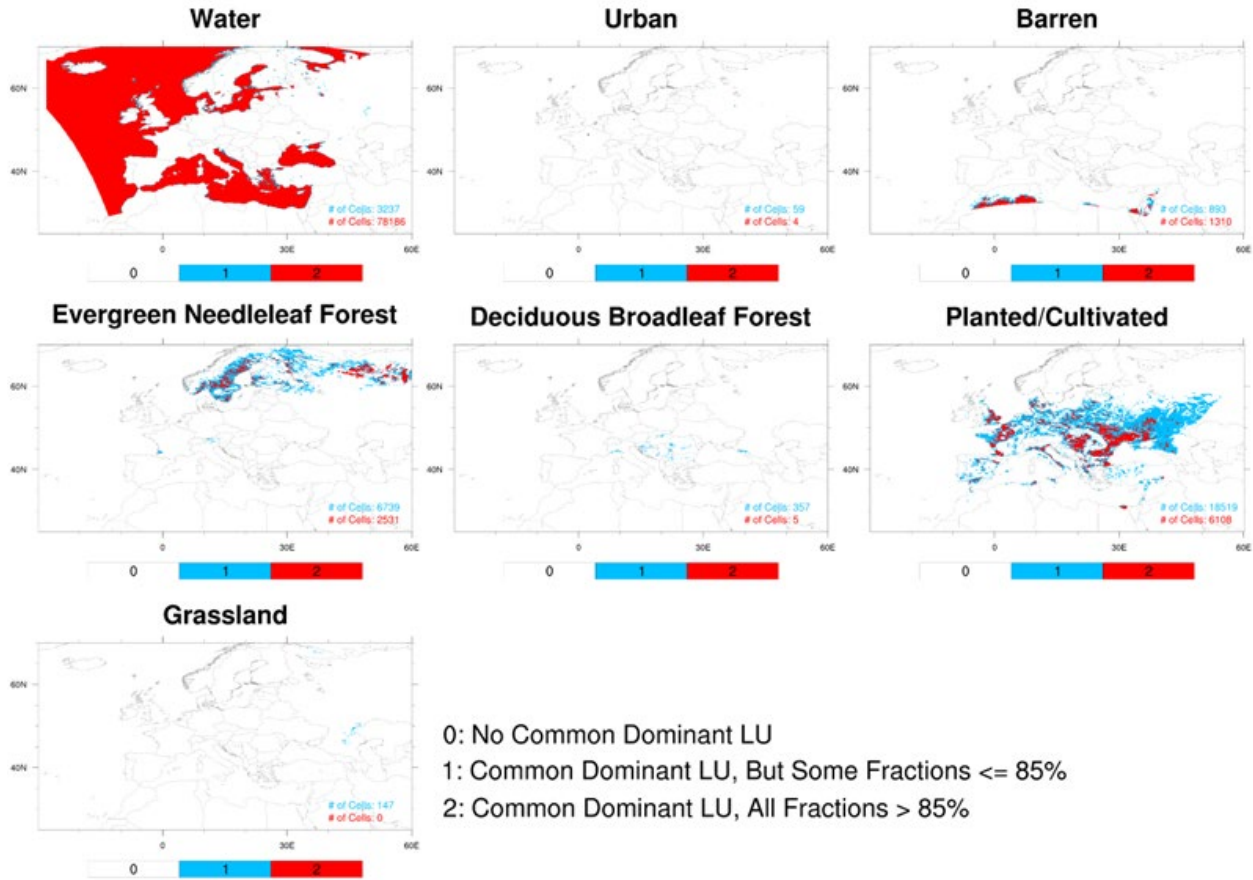

Figure S13. For each LU category, maps depicting the location of grid cells that i) do not share a common dominant LU category across models (white cells), ii) share a common dominant LU category across models but not all models have a fractional coverage  $> 85\%$  for that LU category (blue cells), or iii) share a common dominant LU category across models and all models have a fractional coverage  $> 85\%$  for that LU category (red). Results show are for the EU domain. The number of blue and red cells is shown as insert in each map. No maps are shown for the deciduous needleleaf forest, evergreen broadleaf forest, mixed forest, shrubland, herbaceous, savanna, wetlands, tundra, and snow and ice LU categories because there is not a single common dominant LU grid cell across models for these categories (see Table 5).

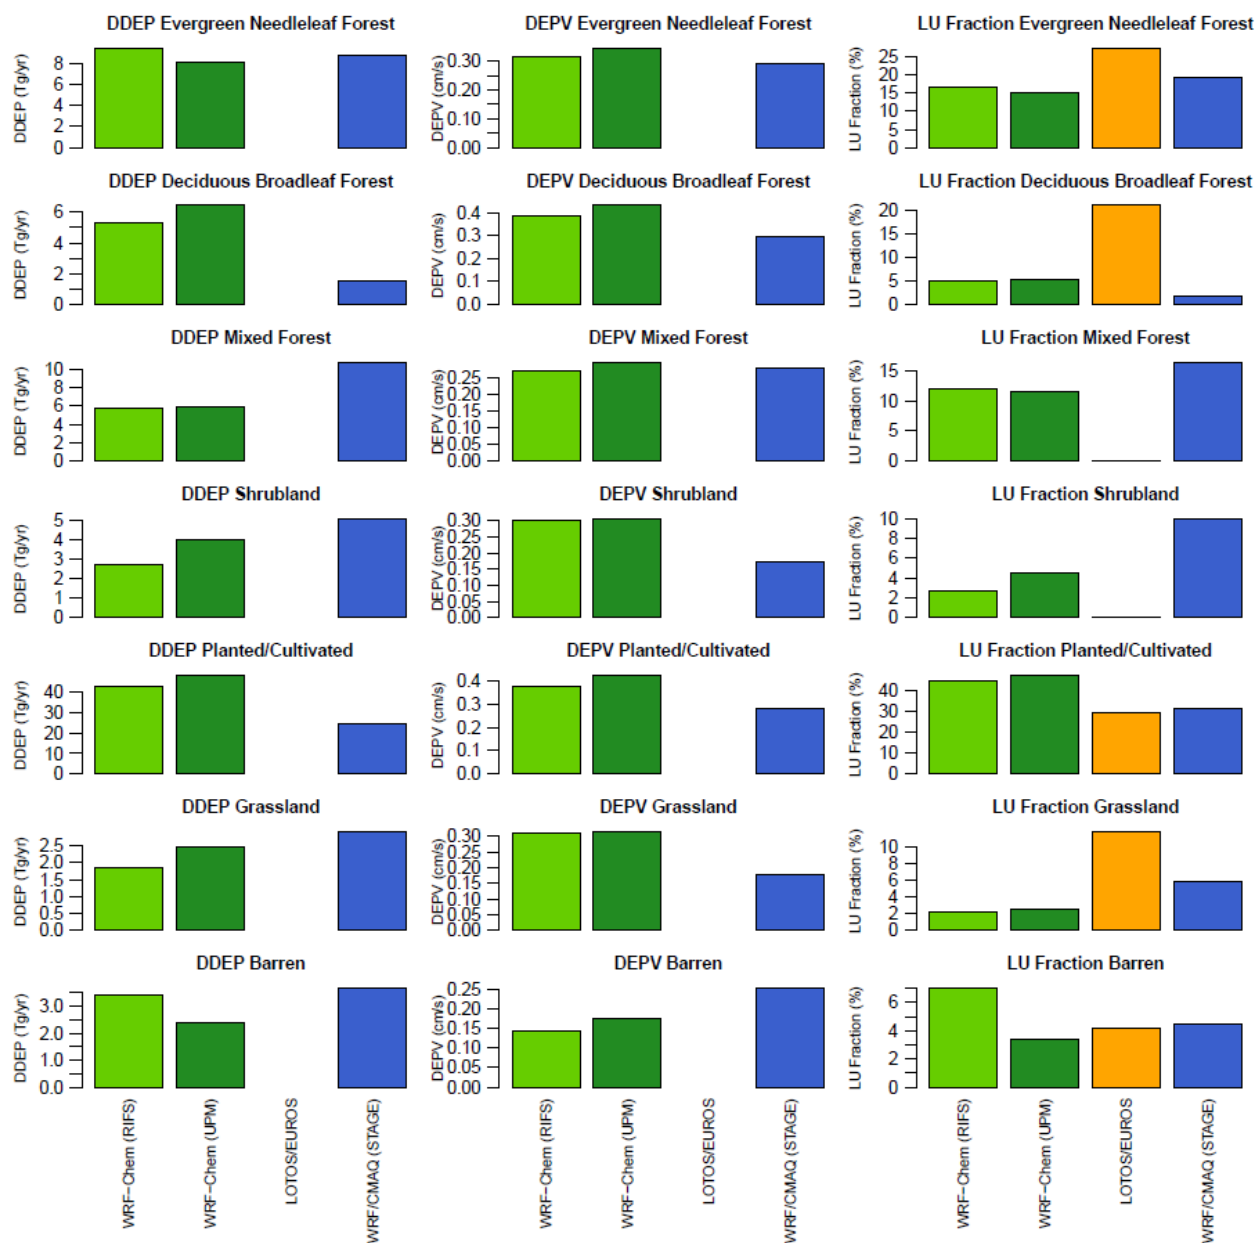

Figure S14. LU-specific annual domain-total dry deposition fluxes (Tg), LU-specific annual mean dry deposition velocity (cm/s), and percentage LU category domain coverage (excluding water grid cells) for seven selected LU categories over the EU domain. For each LU category and model, the analysis considered grid cells in the analysis domain common to all models in which a given model had at least 85% coverage for this LU category. The number of these grid cells differs across models due to underlying differences in LU (see Section 3.3).

## References

- 235 Clifton, O. E., Schwede, D., Hogrefe, C., Bash, J. O., Bland, S., Cheung, P., Coyle, M., Emberson, L., Flemming, J.,  
Fredj, E., Galmarini, S., Ganzeveld, L., Gazetas, O., Goded, I., Holmes, C. D., Horváth, L., Huijnen, V., Li, Q., Makar,  
P. A., Mammarella, I., Manca, G., Munger, J. W., Pérez-Camanyo, J. L., Pleim, J., Ran, L., San Jose, R., Silva, S. J.,  
Staebler, R., Sun, S., Tai, A. P. K., Tas, E., Vesala, T., Weidinger, T., Wu, Z., and Zhang, L.: A single-point modeling  
approach for the intercomparison and evaluation of ozone dry deposition across chemical transport models (Activity  
240 2 of AQMEII4), *Atmos. Chem. Phys.*, 23, 9911–9961, <https://doi.org/10.5194/acp-23-9911-2023>, 2023
